# Supplementary material for: A diaryl Schiff base as a photo- and pH-responsive bifunctional molecule
Source: Royal Society of Chemistry journal article supplement (doi:10.1039/c3ra43960g), 2013-01-01
Supplement: c3ra43960g.pdf [file c3ra43960g.pdf]

## Supporting Information

### Diaryl Schiff base as a photo- and pH-responsive bifunctional molecule

*Xianchuan Li, Tongle Shao, Qian Shi\* and Maolin Hu\**

*College of Chemistry & Materials Engineering, Wenzhou University, Wenzhou 325035, P. R. China*

*Email: [shiq@wzu.edu.cn](mailto:shiq@wzu.edu.cn); [maolin\\_hu@yahoo.com](mailto:maolin_hu@yahoo.com)*

### List of Contents

|                                                                   |    |
|-------------------------------------------------------------------|----|
| 1. Materials.....                                                 | S2 |
| 2. Synthesis of the non-nitro Schiff base (1a, 2a).....           | S2 |
| 3. Structural characterization of compounds 1a, 1a' and 2a . .... | S3 |
| 4. UV- <i>vis</i> spectra and fluorescence spectrum .. ...        | S4 |

## 1. Materials

All chemical reagents were purchased from Aldrich Chemical Company and used without further purification.  $^1\text{H}$  and  $^{13}\text{C}$  NMR spectra were recorded using a Bruker AVANCE-500 spectrometer. UV absorption and fluorescence spectra were obtained at room temperature using a double beam UV-visible spectrophotometer (Shimadzu UV-2501 PC) and a Hitachi F-2700 spectrofluorometer, respectively. Elemental analyses (C, H, N) and high resolution mass spectra were performed with a Fison Carlo Erba 1112 and a ESI-Q-TOF mass spectrometry, and IR spectra were obtained using a Bruker Equinox 55 spectrophotometer in the range of  $400\text{--}4000\text{ cm}^{-1}$ .

## 2. Synthesis of the diaryl Schiff bases (1a, 2a)

The diaryl Schiff base **1a** was typically prepared as follow: to ethanol (60 mL) was added a mixture of 4-hydroxy benzaldehyde (0.122 g, 1 mmol) and 4-nitro-o-phenylenediamine (0.459 g, 3 mmol), then the mixture was heated to reflux for 48 h under argon atmosphere. After cooling to room temperature, the liquid was poured into the water (1 L), filtered and washed with water and ethanol. Then a 41% yield of the title nitro-substituted Schiff base of 0.105 g was provided.

The non-nitro Schiff base **2a** was synthesized as follow: to ethanol (40 mL) was added a mixture of 4-hydroxy benzaldehyde (0.122 g, 1 mmol) and o-phenylenediamine (0.324 g, 3 mmol), then the mixture was heated to  $50\text{ }^{\circ}\text{C}$  for 48 h under argon atmosphere. After cooling to room temperature, the liquid was

poured into the water (1 L), filtered and washed with water. Then a 87% yield of the title non-nitro Schiff base **2a** was provided.

### 3. Structural characterization of compounds **1a**, **1a'** and **2a**

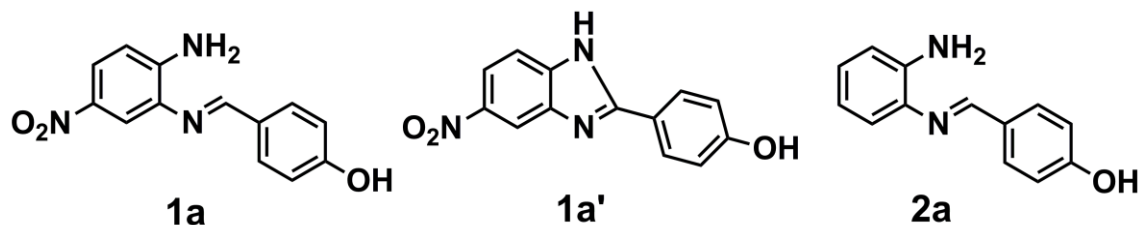

**(E)-4-(((2-amino-5-nitrophenyl)imino)methyl)phenol (1a):**  $^1\text{H}$  NMR (500 MHz, ppm,  $d_6$ -DMSO)  $\delta$  10.17 (s, 1H, -OH), 8.67 (s, 1H, -N=CH-), 7.96 – 7.87 (m, 4H, Ar<sub>1</sub>-H, Ar<sub>2</sub>-H), 6.88 (d,  $J$  = 8.5 Hz, 2H, Ar<sub>2</sub>-H), 6.74 (d,  $J$  = 8.9 Hz, 1H, Ar<sub>1</sub>-H), 6.68 (s, 2H, -NH<sub>2</sub>);  $^{13}\text{C}$  NMR (126 MHz, ppm,  $d_6$ -DMSO)  $\delta$  160.89, 159.34, 150.82, 136.03, 134.74, 131.26, 127.51, 123.73, 115.55, 112.60, 112.38. Anal. Calcd for C<sub>13</sub>H<sub>11</sub>N<sub>3</sub>O<sub>3</sub>: C, 60.70; H, 4.31; N, 16.33%. Found: C, 61.02; H, 4.10; N, 16.24%. HRMS (ESI) calculated for C<sub>13</sub>H<sub>11</sub>N<sub>3</sub>O<sub>3</sub> (M+H)<sup>+</sup> 258.0800, found 258.0872. IR (KBr, cm<sup>-1</sup>) 3406 and 3314  $\nu$ (Ar-NH<sub>2</sub>), 1611  $\nu$ (C=N), 1507,  $\nu$ (Ar-C), 1339  $\nu$ (Ar-NO<sub>2</sub>), 1169  $\nu$ (Ar-OH), 824  $\nu$ (Ar-H).

**4-(5-nitro-1H-benzo[d]imidazol-2-yl)phenol (1a'):**  $^1\text{H}$  NMR (500 MHz, ppm,  $d_6$ -DMSO)  $\delta$  10.20 (s, 1H, -OH), 8.40 (d,  $J$  = 2.0 Hz, 1H, Ar<sub>1</sub>-H), 8.10 (dd,  $J$  = 8.8, 2.3 Hz, 1H, Ar<sub>1</sub>-H), 8.06 (d,  $J$  = 8.7 Hz, 2H, Ar<sub>2</sub>-H), 7.70 (d,  $J$  = 8.8 Hz, 1H, Ar<sub>1</sub>-H), 6.96 (d,  $J$  = 8.7 Hz, 2H, Ar<sub>2</sub>-H).

**(E)-4-(((2-aminophenyl)imino)methyl)phenol (2a):**  $^1\text{H}$  NMR (500 MHz, ppm,  $d_6$ -DMSO):  $\delta$  12.69 (s, 1H, -OH), 10.05 (s, 1H, -N=CH-), 8.06 (d,  $J$  = 8.7 Hz, 2H, Ar<sub>2</sub>-H), 7.57 (m, 2H, Ar<sub>1</sub>-H), 7.17 (dd,  $J$  = 6.0, 3.1 Hz, 2H, Ar<sub>1</sub>-H), 6.96 (d,  $J$

= 8.7 Hz, 2H, Ar<sub>2</sub>-H), 3.53 (s, 2H, -NH<sub>2</sub>); <sup>13</sup>C NMR (126 MHz, ppm, *d*<sub>6</sub>-DMSO):  
δ 159.09, 151.75, 130.57, 128.11, 127.46, 121.57, 121.14, 115.64, 115.51,  
115.45. Anal. Calcd for C<sub>13</sub>H<sub>12</sub>N<sub>2</sub>O: C, 73.56; H, 5.70; N, 13.20%. Found: C,  
73.43; H, 5.26; N, 13.08%. IR (KBr, cm<sup>-1</sup>) 3236 ν(Ar-NH<sub>2</sub>), 1610 ν(C=N), 1448  
ν(Ar-C), 1177 ν(Ar-OH), 836 and 743 ν(Ar-H).

#### 4. UV-*vis* spectra and fluorescence spectrum

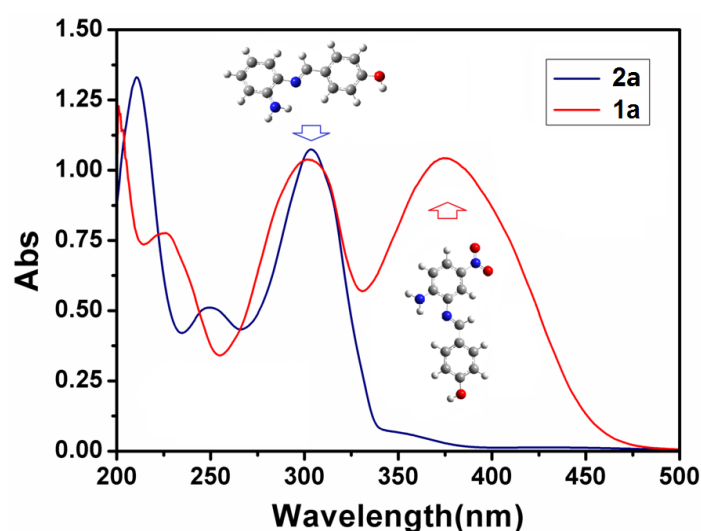

**Fig. S1** UV-*vis* spectra of compounds **1a** (50 μM, in ethanol) and **2a** (100 μM, in ethanol).

As shown in Fig. S1, three red shifts were observed due to the addition of the nitro group. The second absorbing peak of the compound **1a** shared the same absorbing wavelength (307 nm) with the first absorbing peak of the compound **2a**, and the nitro group caused increasing of intensity of UV absorption of the compound **1a**, as well. Besides, the sensitivity to UV light is strengthened because of the nitro group on the compound **1a**.

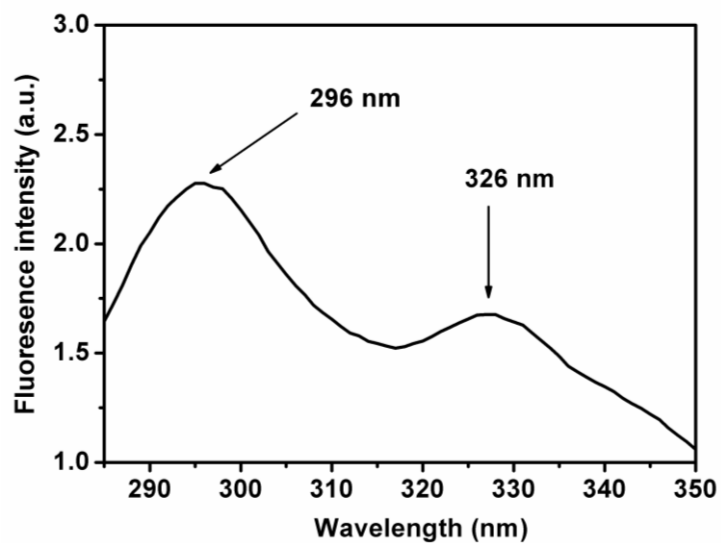

**Fig. S2** Fluorescence spectrum of the compound **1a** in ethanol ( $\lambda_{\text{ex}} = 270$  nm).

When the compound **1a** was excited at 270 nm, the weak emission of fluorescence at 296 nm and 326 nm were observed (Fig. S2).
